# Supplementary material for: Hierarchical Bi2WO6/TiO2-nanotube composites derived from natural cellulose for visible-light photocatalytic treatment of pollutants
Source: publisher site journal article supplement (doi:10.3762/bjnano.13.66), 2022-08-04
Supplement: Additional file 1 [file 2190-4286-13-66-S1.pdf]

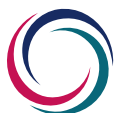

## Supporting Information

for

### **Hierarchical Bi<sub>2</sub>WO<sub>6</sub>/TiO<sub>2</sub>-nanotube composites derived from natural cellulose for visible-light photocatalytic treatment of pollutants**

Zehao Lin, Zhan Yang and Jianguo Huang

*Beilstein J. Nanotechnol.* **2022**, *13*, 745–762. [doi:10.3762/bjnano.13.66](https://doi.org/10.3762/bjnano.13.66)

## Additional figures

**Table S1:** The dosages of  $\text{Bi}(\text{NO}_3)_3 \cdot 5\text{H}_2\text{O}$  and  $\text{Na}_2\text{WO}_4 \cdot 2\text{H}_2\text{O}$  reagents in the preparation processes of the hierarchical  $\text{Bi}_2\text{WO}_6/\text{TiO}_2\text{-NT}$  nanocomposites.

| Nanocomposites                                       | $\text{Bi}(\text{NO}_3)_3 \cdot 5\text{H}_2\text{O}/\text{mg}$ | $\text{Na}_2\text{WO}_4 \cdot 2\text{H}_2\text{O}/\text{mg}$ |
|------------------------------------------------------|----------------------------------------------------------------|--------------------------------------------------------------|
| 30%– $\text{Bi}_2\text{WO}_6/\text{TiO}_2\text{-NT}$ | 23.8                                                           | 8.1                                                          |
| 50%– $\text{Bi}_2\text{WO}_6/\text{TiO}_2\text{-NT}$ | 55.6                                                           | 18.9                                                         |
| 70%– $\text{Bi}_2\text{WO}_6/\text{TiO}_2\text{-NT}$ | 129.7                                                          | 44.1                                                         |
| 90%– $\text{Bi}_2\text{WO}_6/\text{TiO}_2\text{-NT}$ | 500.3                                                          | 170.2                                                        |

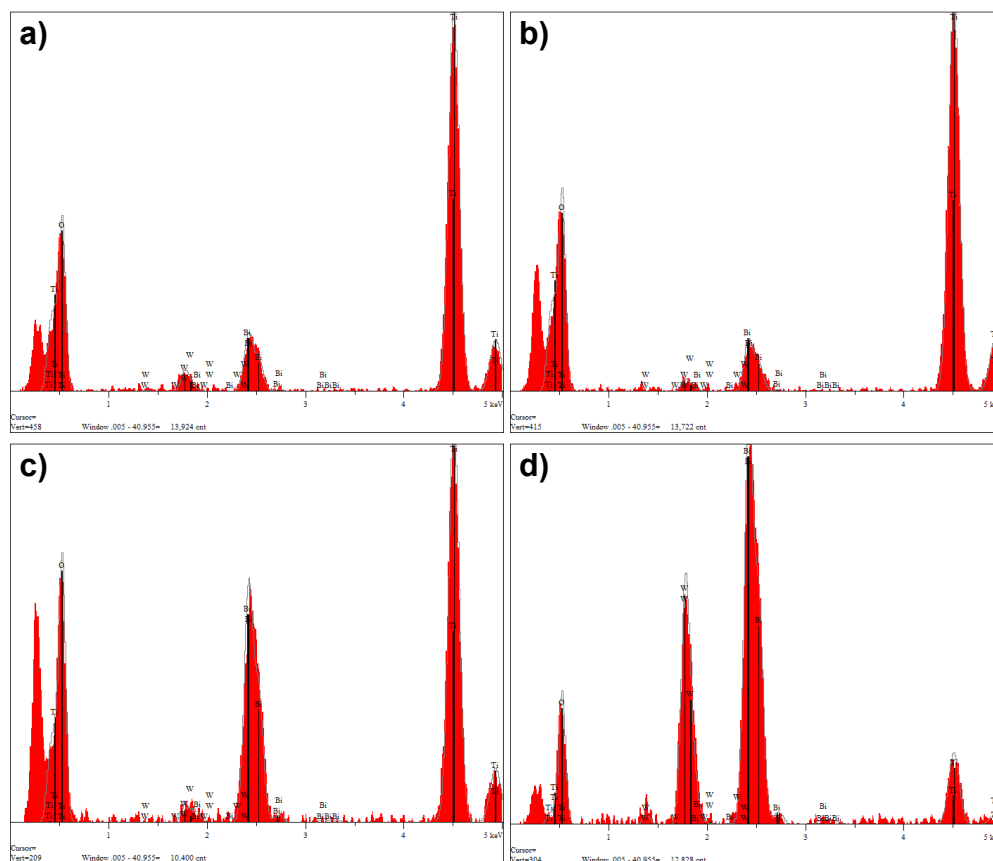

**Figure S1:** EDX spectra of the hierarchical (a) 30%– $\text{Bi}_2\text{WO}_6/\text{TiO}_2\text{-NT}$ , (b) 50%– $\text{Bi}_2\text{WO}_6/\text{TiO}_2\text{-NT}$ , (c) 70%– $\text{Bi}_2\text{WO}_6/\text{TiO}_2\text{-NT}$ , and (d) 90%– $\text{Bi}_2\text{WO}_6/\text{TiO}_2\text{-NT}$  nanocomposites.

**Table S2:** Practical mass contents of Ti and Bi elements, as well as the Bi<sub>2</sub>WO<sub>6</sub> component in the hierarchical Bi<sub>2</sub>WO<sub>6</sub>/TiO<sub>2</sub>-NT nanocomposites.

| Nanocomposites                                            | Practical mass content of Ti/wt % | Practical mass content of Bi/wt % | Practical mass content of Bi <sub>2</sub> WO <sub>6</sub> /wt % |
|-----------------------------------------------------------|-----------------------------------|-----------------------------------|-----------------------------------------------------------------|
| 30%-Bi <sub>2</sub> WO <sub>6</sub> /TiO <sub>2</sub> -NT | 47.04                             | 29.26                             | 38.4                                                            |
| 50%-Bi <sub>2</sub> WO <sub>6</sub> /TiO <sub>2</sub> -NT | 37.56                             | 44.52                             | 54.3                                                            |
| 70%-Bi <sub>2</sub> WO <sub>6</sub> /TiO <sub>2</sub> -NT | 22.40                             | 60.29                             | 72.9                                                            |
| 90%-Bi <sub>2</sub> WO <sub>6</sub> /TiO <sub>2</sub> -NT | 3.79                              | 74.50                             | 95.2                                                            |

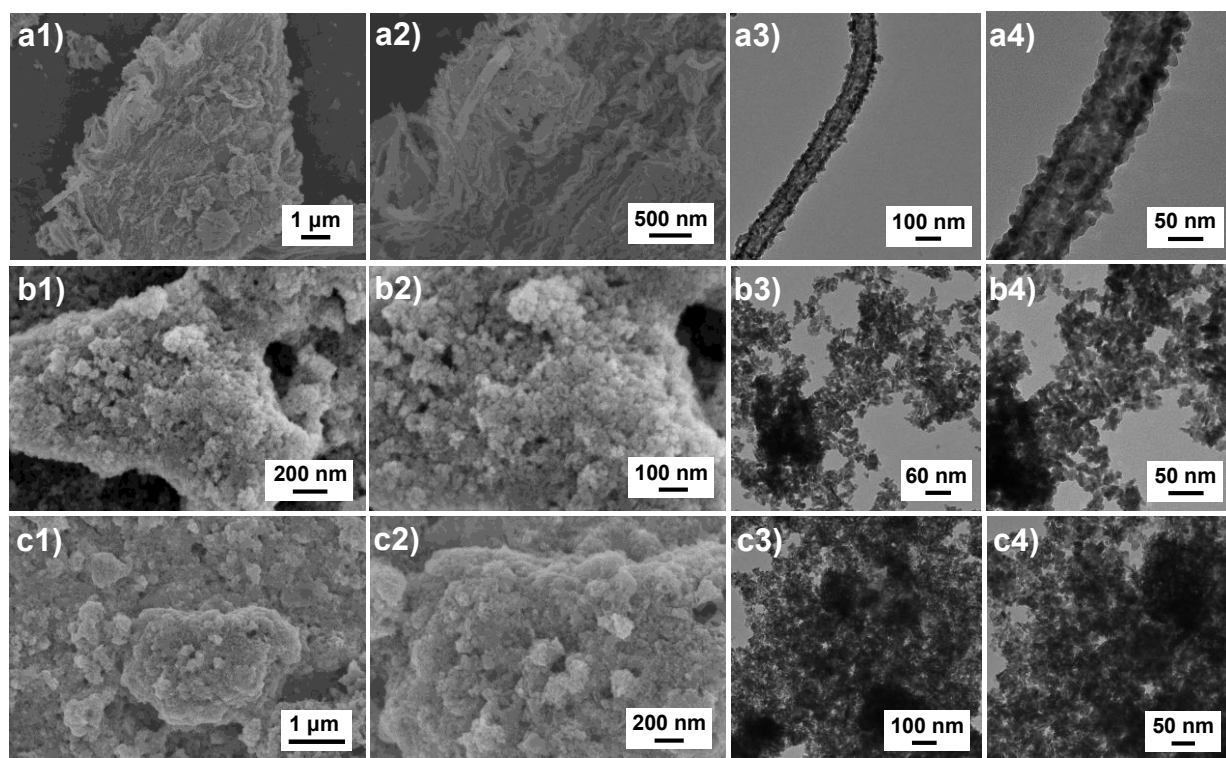

**Figure S2:** Electron micrographs of the (a1–a4) pure TiO<sub>2</sub>-NT sample, (b1–b4) pure Bi<sub>2</sub>WO<sub>6</sub> powder sample, and (c1–c4) the Bi<sub>2</sub>WO<sub>6</sub>/TiO<sub>2</sub> sample prepared without the cellulose template. The first two columns represent the FE-SEM images, and the last two columns exhibit the TEM images of the corresponding samples.

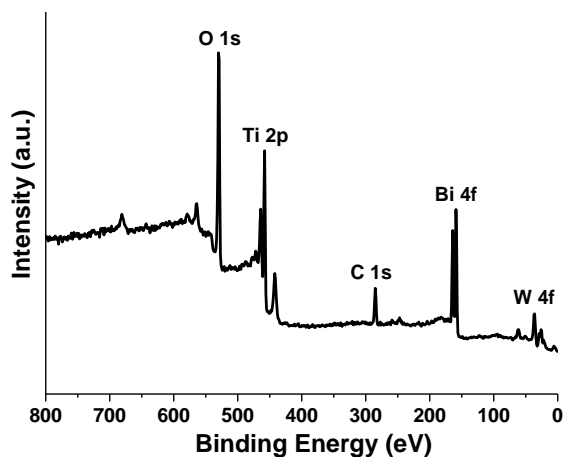

**Figure S3:** XPS survey spectrum of the hierarchical 70%-Bi<sub>2</sub>WO<sub>6</sub>/TiO<sub>2</sub>-NT nanocomposite.

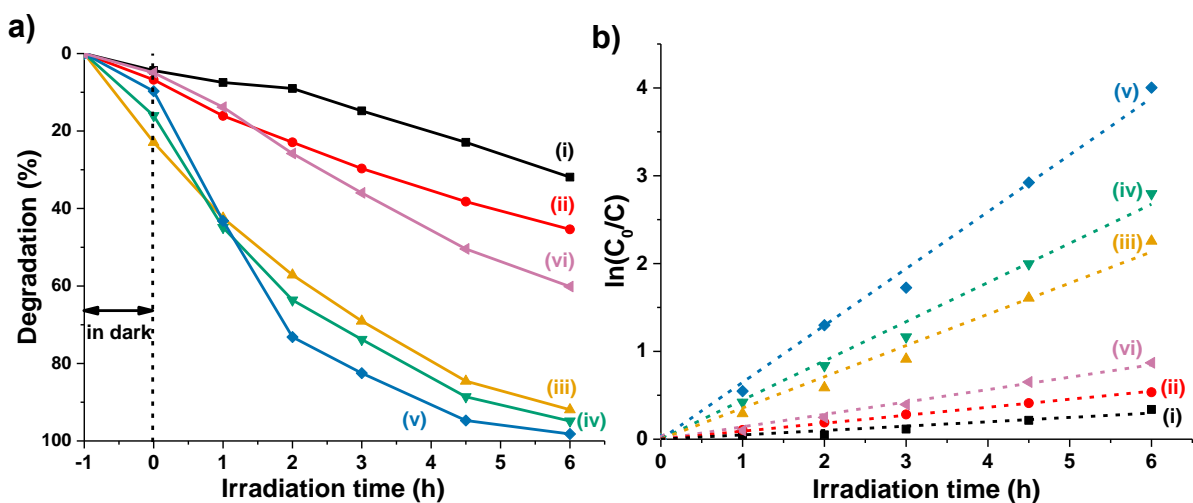

**Figure S4:** (a) The visible-light ( $\lambda > 420$  nm) induced photocatalytic degradation profiles and (b) the corresponding linear fitting curves based on the pseudo-first-order kinetic model towards the photodegradation of RhB pollutant solution ( $10 \text{ mg}\cdot\text{L}^{-1}$ ) by the (i) pure TiO<sub>2</sub>-NT,

(ii) pure  $\text{Bi}_2\text{WO}_6$  powder, as well as the hierarchical (iii) 30%– $\text{Bi}_2\text{WO}_6/\text{TiO}_2\text{-NT}$ , (iv) 50%– $\text{Bi}_2\text{WO}_6/\text{TiO}_2\text{-NT}$ , (v) 70%– $\text{Bi}_2\text{WO}_6/\text{TiO}_2\text{-NT}$ , and (vi) 90%– $\text{Bi}_2\text{WO}_6/\text{TiO}_2\text{-NT}$  nanocomposites.

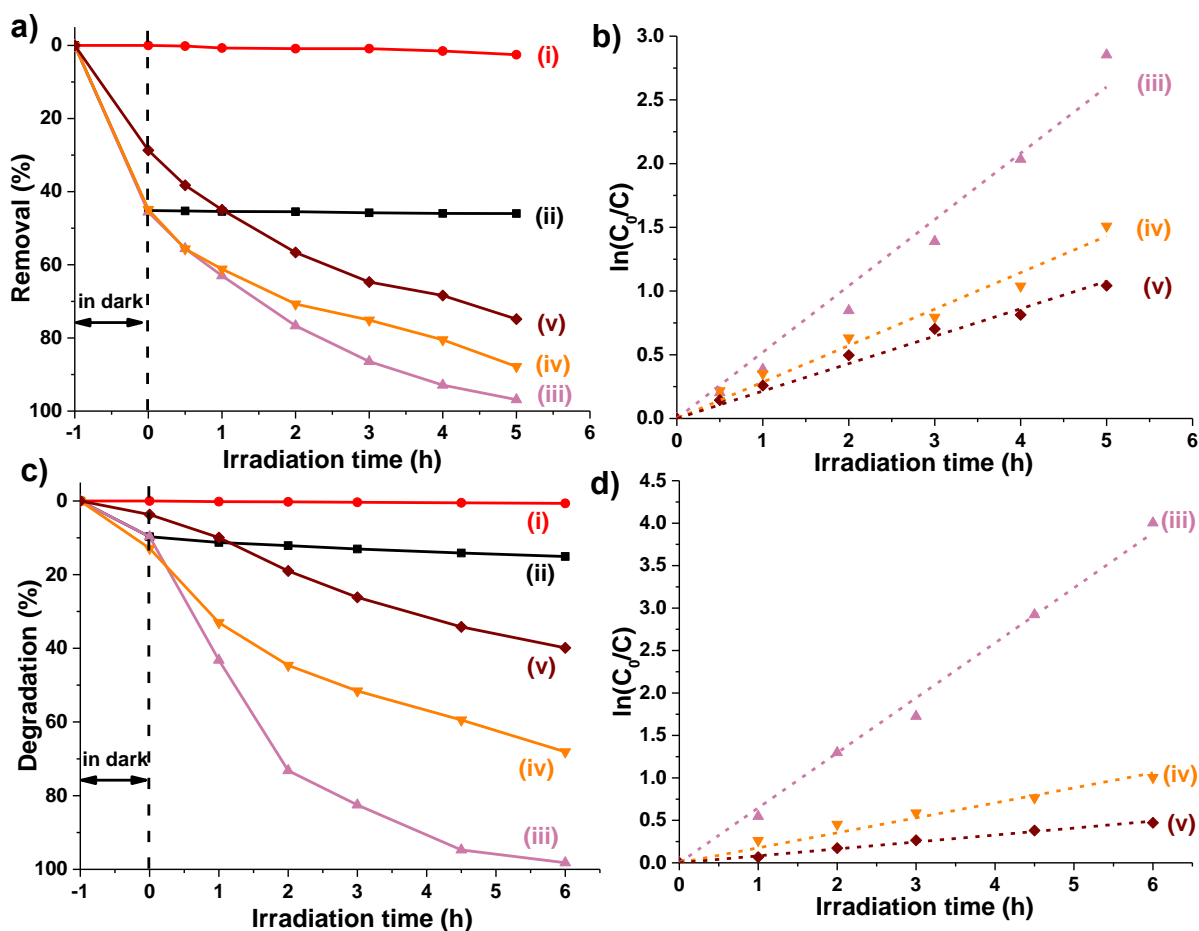

**Figure S5:** (a) The reduction profiles towards Cr(VI) pollutant solution ( $10 \text{ mg}\cdot\text{L}^{-1}$ , pH 4) and (c) the degradation profiles towards RhB pollutant solution ( $10 \text{ mg}\cdot\text{L}^{-1}$ ) as well as (b,d) the corresponding linear fitting curves based on the pseudo-first-order kinetic model under different conditions. (i) The self-reduction reaction of Cr(VI) or self-degradation reaction of RhB without photocatalysts under visible-light ( $\lambda > 420 \text{ nm}$ ) irradiation. (ii) The self-adsorption by the hierarchical 70%– $\text{Bi}_2\text{WO}_6/\text{TiO}_2\text{-NT}$  nanocomposite towards Cr(VI) or RhB pollutant solution. And the visible-light ( $\lambda > 420 \text{ nm}$ ) induced photocatalytic reactions towards Cr(VI) or RhB pollutant solution by employing (iii) the hierarchical 70%– $\text{Bi}_2\text{WO}_6/\text{TiO}_2\text{-NT}$

nanocomposite, (iv) the  $\text{Bi}_2\text{WO}_6/\text{TiO}_2$  sample prepared without the cellulose template, and (v) the  $\text{Bi}_2\text{WO}_6\text{-TiO}_2$  sample prepared by physical blend as the photocatalysts.

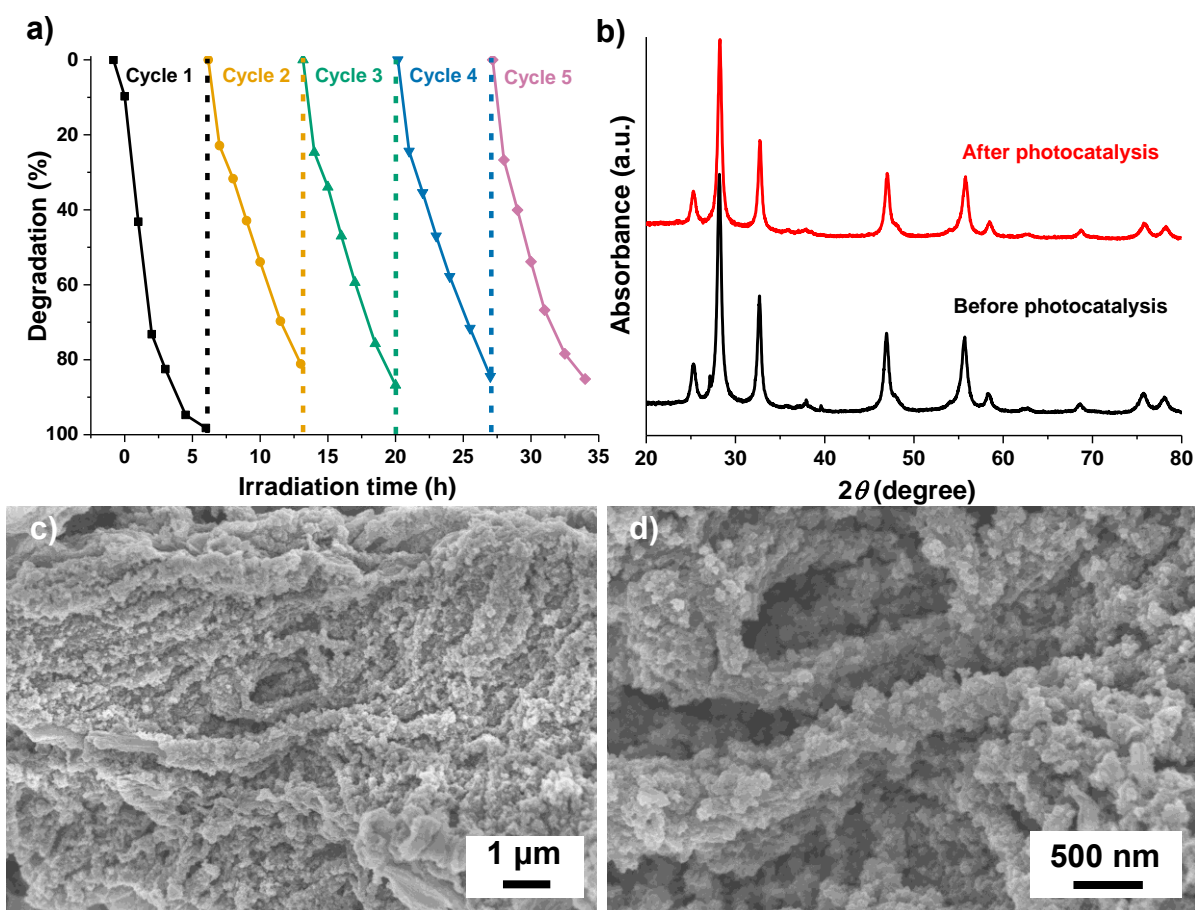

**Figure S6:** (a) The visible-light ( $\lambda > 420$  nm) induced photocatalytic degradation profiles towards the photodegradation of RhB pollutant solution ( $10 \text{ mg}\cdot\text{L}^{-1}$ ) for five cycles by the hierarchical 70%– $\text{Bi}_2\text{WO}_6/\text{TiO}_2\text{-NT}$  nanocomposite. (b) The XRD patterns of the 70%– $\text{Bi}_2\text{WO}_6/\text{TiO}_2\text{-NT}$  nanocomposites before and after 5-cycle photocatalysis. (c,d) The FE-SEM images of the 70%– $\text{Bi}_2\text{WO}_6/\text{TiO}_2\text{-NT}$  nanocomposite after 5-cycle photocatalysis.

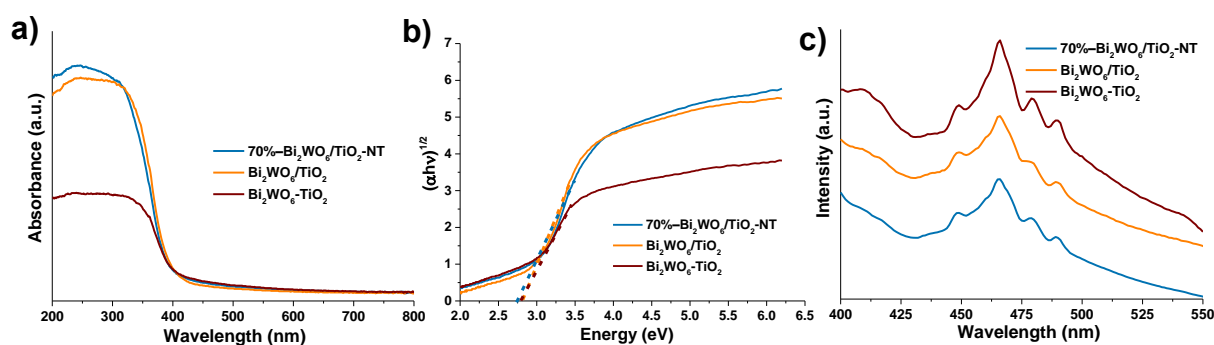

**Figure S7:** (a) The UV-vis DRS, (b) the band gaps determined by the intercept on the x-axis of the respective Tauc plots, and the PL emission spectra under the excitation of 360 nm of the hierarchical 70%-Bi<sub>2</sub>WO<sub>6</sub>/TiO<sub>2</sub>-NT nanocomposite, the Bi<sub>2</sub>WO<sub>6</sub>/TiO<sub>2</sub> sample prepared without the cellulose template, and the Bi<sub>2</sub>WO<sub>6</sub>-TiO<sub>2</sub> sample prepared by physical blend.

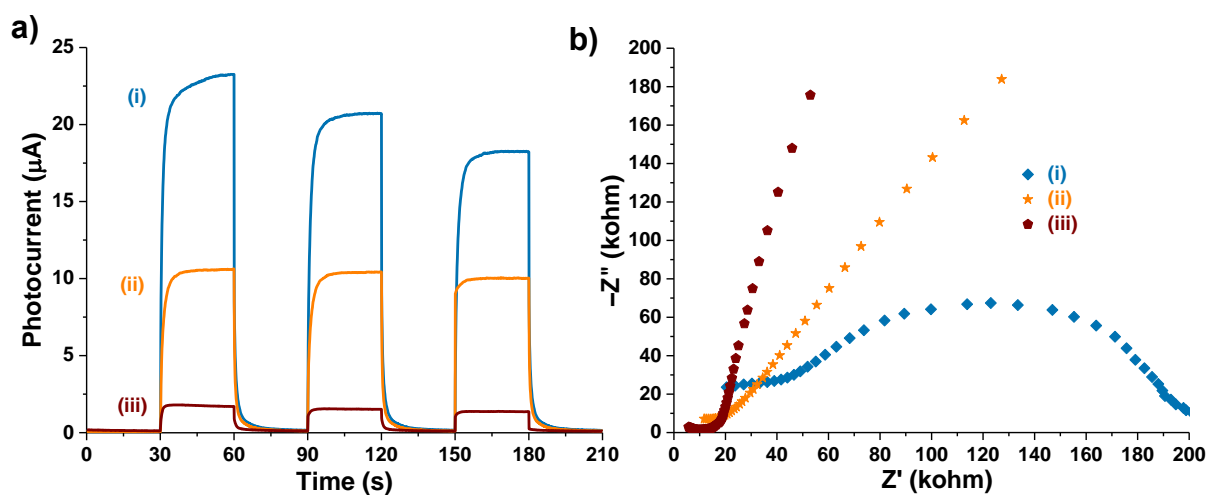

**Figure S8:** (a) The transient photocurrent responses and (b) EIS Nyquist plots of (i) the hierarchical 70%-Bi<sub>2</sub>WO<sub>6</sub>/TiO<sub>2</sub>-NT nanocomposite, (ii) the Bi<sub>2</sub>WO<sub>6</sub>/TiO<sub>2</sub> sample prepared without the cellulose template, and (iii) the Bi<sub>2</sub>WO<sub>6</sub>-TiO<sub>2</sub> sample prepared by physical blend.

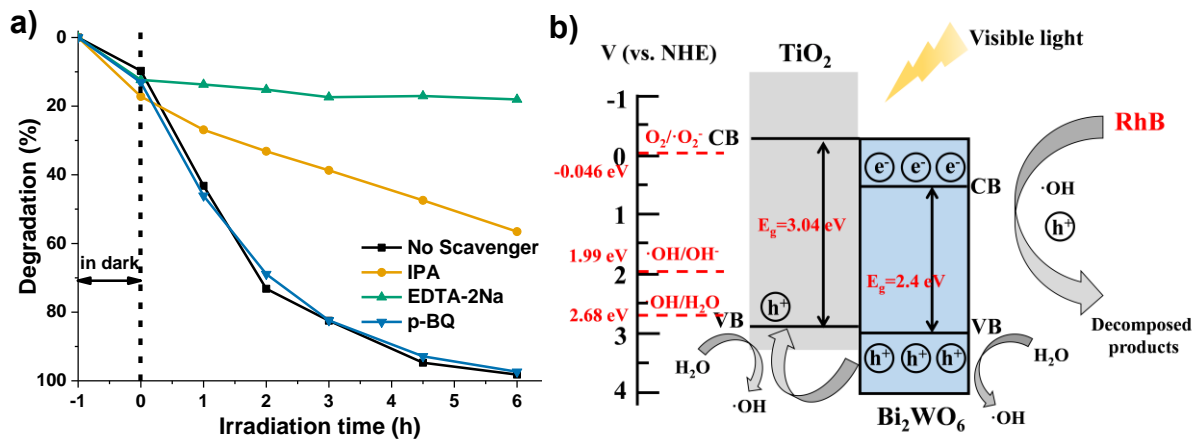

**Figure S9:** (a) The visible-light ( $\lambda > 420$  nm) induced photocatalytic degradation profiles towards the RhB pollutant solution ( $10 \text{ mg}\cdot\text{L}^{-1}$ ) added with IPA, EDTA-2Na, and p-BQ by the hierarchical 70%– $\text{Bi}_2\text{WO}_6/\text{TiO}_2$ -NT nanocomposite. (b) The schematic illustration of the photocatalytic degradation mechanism towards the RhB pollutant by the hierarchical  $\text{Bi}_2\text{WO}_6/\text{TiO}_2$ -NT nanocomposite under the irradiation of visible light ( $\lambda > 420$  nm).



**Table S3:** Comparison of the hierarchical Bi<sub>2</sub>WO<sub>6</sub>/TiO<sub>2</sub>-nanotube composite with the natural cellulose substance derived Ag<sub>2</sub>O-nanoparticle/TiO<sub>2</sub>-nanotube composite, g-C<sub>3</sub>N<sub>4</sub>/TiO<sub>2</sub>-nanotube composite, and H<sub>3</sub>PW<sub>12</sub>O<sub>40</sub>/TiO<sub>2</sub> nanocomposite reported by our group.

| composites                                                            | Light source                   | morphology                                                                                                                                                   | pollutants        | $K_{app}$                                                                  | Ref.      |
|-----------------------------------------------------------------------|--------------------------------|--------------------------------------------------------------------------------------------------------------------------------------------------------------|-------------------|----------------------------------------------------------------------------|-----------|
| Bi <sub>2</sub> WO <sub>6</sub> /TiO <sub>2</sub> -NT                 | 350 W Xe<br>$\lambda > 420$ nm | Bi <sub>2</sub> WO <sub>6</sub> nanoparticles coated on the TiO <sub>2</sub> nanotubes                                                                       | RhB<br>Cr(VI)     | 0.65 h <sup>-1</sup><br>0.52 h <sup>-1</sup>                               | This work |
| Ag <sub>2</sub> O-NP/TiO <sub>2</sub> -NT                             | 300 W, Hg                      | Ag <sub>2</sub> O nanoparticles coated on the TiO <sub>2</sub> nanotubes                                                                                     | MB<br>RhB<br>NFCX | 0.62 min <sup>-1</sup><br>0.37 min <sup>-1</sup><br>0.29 min <sup>-1</sup> | [1]       |
| g-C <sub>3</sub> N <sub>4</sub> /TiO <sub>2</sub> -NT                 | 350 W Xe<br>$\lambda > 420$ nm | g-C <sub>3</sub> N <sub>4</sub> layer anchored on the TiO <sub>2</sub> nanotube surfaces                                                                     | MB                | 0.21 h <sup>-1</sup>                                                       | [2]       |
| H <sub>3</sub> PW <sub>12</sub> O <sub>40</sub> /TiO <sub>2</sub> -NT | 300 W, Hg                      | H <sub>3</sub> PW <sub>12</sub> O <sub>40</sub> nanoparticles coated on the TiO <sub>2</sub> nanotubes or on the TiO <sub>2</sub> /cellulose composite sheet | MB                | 0.54 min <sup>-1</sup>                                                     | [3]       |

## References

1. Lin, Z.; Lu, Y.; Huang, J. *Cellulose* **2019**, *26*, 6683–6700.
2. Lin, Z.; Yu, B.; Huang, J. *Langmuir* **2020**, *36*, 5967–5978.
3. Lin, Z.; Huang, J. *Sep. Purif. Technol.* **2021**, *264*, 118427.
